# Supplementary material
Source: PubMed Central journal article supplement (PMC7854867)
Supplement: NIHMS1616916-supplement-Table_S1.pdf [file NIHMS1616916-supplement-Table_S1.pdf]

**Table S1.** Proteins identified by LC-MS/MS analyzed for global sex difference, global minocycline effect and the interaction effect between sex and minocycline treatment

| Protein information |           |                                                                                                                                                                                                                                                                                                                                                                                                     |                     | ANOVA    | Global sex difference                         |          | Global minocycline difference                 |          | Interaction Effect                      |          |
|---------------------|-----------|-----------------------------------------------------------------------------------------------------------------------------------------------------------------------------------------------------------------------------------------------------------------------------------------------------------------------------------------------------------------------------------------------------|---------------------|----------|-----------------------------------------------|----------|-----------------------------------------------|----------|-----------------------------------------|----------|
| uniProt Identifier  | uniProtKB | Protein names                                                                                                                                                                                                                                                                                                                                                                                       | Gene names          | q-values | ((MalesH + MalesHM) - (FemalesH + FemalesHM)) | p-values | ((MalesHM + FemalesHM) - (MalesH + FemalesH)) | p-values | Sex difference x minocycline difference | p-values |
| PYR1_MOUSE          | B2RQC6    | CAD protein [Includes: Glutamine-dependent carbamoyl-phosphate synthase (EC 6.3.5.5); Aspartate carbamoyltransferase (EC 2.1.3.2); Dihydroorotase (EC 3.5.2.3)]                                                                                                                                                                                                                                     | Cad                 | 7,94E-03 | 0,82                                          | 3,09E-04 | 0,46                                          | 2,47E-02 | 0,72                                    | 6,84E-02 |
| FIBA_MOUSE          | E9PV24    | Fibrinogen alpha chain [Cleaved into: Fibrinopeptide A; Fibrinogen alpha chain]                                                                                                                                                                                                                                                                                                                     | Fga                 | 2,55E-02 | 0,19                                          | 5,83E-03 | 0,11                                          | 7,91E-02 | 0,32                                    | 1,61E-02 |
| KNG1_MOUSE          | O08677    | Kininogen-1 [Cleaved into: Kininogen-1 heavy chain; Bradykinin; Kininogen-1 light chain]                                                                                                                                                                                                                                                                                                            | Kng1 Kng            | 1,13E-02 | 0,14                                          | 2,01E-01 | 0,40                                          | 9,17E-04 | 0,57                                    | 1,22E-02 |
| IMPA1_MOUSE         | O55023    | Inositol monophosphatase 1 (IMP 1) (IMPase 1) (EC 3.1.3.25) (D-galactose 1-phosphate phosphatase) (EC 3.1.3.94) (Inositol-1(or 4)-monophosphatase 1) (Lithium-sensitive myo-inositol monophosphatase A1)                                                                                                                                                                                            | Impa1               | 1,56E-03 | 0,05                                          | 1,31E-02 | -0,07                                         | 2,24E-03 | -0,15                                   | 1,28E-03 |
| CO3_MOUSE           | P01027    | Complement C3 (HSE-MSF) [Cleaved into: Complement C3 beta chain; C3-beta-c (C3bc); Complement C3 alpha chain; C3a anaphylatoxin; Acylation stimulating protein (ASP) (C3adesArg); Complement C3b alpha' chain; Complement C3c alpha' chain fragment 1; Complement C3dg fragment; Complement C3g fragment; Complement C3d fragment; Complement C3f fragment; Complement C3c alpha' chain fragment 2] | C3                  | 1,67E-02 | 0,01                                          | 8,71E-01 | 0,20                                          | 1,62E-03 | 0,33                                    | 8,39E-03 |
| CO4B_MOUSE          | P01029    | Complement C4-B [Cleaved into: Complement C4 beta chain; Complement C4 alpha chain; C4a anaphylatoxin; Complement C4 gamma chain]                                                                                                                                                                                                                                                                   | C4b C4              | 1,91E-02 | 0,00                                          | 9,88E-01 | 0,02                                          | 6,57E-01 | 0,39                                    | 6,21E-04 |
| HBA_MOUSE           | P01942    | Hemoglobin subunit alpha (Alpha-globin) (Hemoglobin alpha chain)                                                                                                                                                                                                                                                                                                                                    | Hba Hba-a1          | 1,73E-03 | 0,79                                          | 9,14E-06 | 0,28                                          | 4,77E-02 | 0,08                                    | 7,55E-01 |
| HBB1_MOUSE          | P02088    | Hemoglobin subunit beta-1 (Beta-1-globin) (Hemoglobin beta-1 chain) (Hemoglobin beta-major chain)                                                                                                                                                                                                                                                                                                   | Hbb-b1              | 1,07E-02 | 0,63                                          | 9,49E-05 | 0,28                                          | 4,15E-02 | 0,11                                    | 6,80E-01 |
| B3AT_MOUSE          | P04919    | Band 3 anion transport protein (Anion exchange protein 1) (AE 1) (Anion exchanger 1) (MEB3) (Solute carrier family 4 member 1) (CD antigen CD233)                                                                                                                                                                                                                                                   | Slc4a1 Ae1          | 2,55E-02 | 0,38                                          | 1,68E-04 | 0,10                                          | 2,21E-01 | 0,07                                    | 6,76E-01 |
| APOA4_MOUSE         | P06728    | Apolipoprotein A-IV (Apo-AIV) (ApoA-IV) (Apolipoprotein A4)                                                                                                                                                                                                                                                                                                                                         | Apoa4               | 6,43E-03 | 0,18                                          | 1,35E-02 | 0,26                                          | 1,08E-03 | 0,35                                    | 1,87E-02 |
| SPRC_MOUSE          | P07214    | SPARC (Basement-membrane protein 40) (BM-40) (Osteonectin) (ON) (Secreted protein acidic and rich in cysteine)                                                                                                                                                                                                                                                                                      | Sparc               | 4,34E-02 | 0,04                                          | 4,33E-01 | 0,01                                          | 9,07E-01 | 0,39                                    | 1,21E-03 |
| ALBU_MOUSE          | P07724    | Serum albumin                                                                                                                                                                                                                                                                                                                                                                                       | Alb Alb-1 Alb1      | 8,72E-03 | 0,08                                          | 5,04E-01 | 0,58                                          | 1,50E-04 | 0,55                                    | 3,73E-02 |
| SPA3K_MOUSE         | P07759    | Serine protease inhibitor A3K (Serpin A3K) (Contrapsin) (SPI-2)                                                                                                                                                                                                                                                                                                                                     | Serpina3k Mcm2 Spi2 | 1,69E-06 | 0,93                                          | 2,27E-08 | 0,44                                          | 4,76E-04 | 0,77                                    | 1,55E-03 |
| NFM_MOUSE           | P08553    | Neurofilament medium polypeptide (NF-M) (160 kDa neurofilament protein) (Neurofilament 3) (Neurofilament triplet M protein)                                                                                                                                                                                                                                                                         | Nefm Nef3 Nfm       | 3,67E-02 | 0,18                                          | 1,73E-04 | 0,01                                          | 7,74E-01 | -0,04                                   | 5,96E-01 |
| HSPB1_MOUSE         | P14602    | Heat shock protein beta-1 (HspB1) (Growth-related 25 kDa protein) (Heat shock 25 kDa protein) (HSP 25) (Heat shock 27 kDa protein) (HSP 27) (p25)                                                                                                                                                                                                                                                   | Hspb1 Hsp25 Hsp27   | 2,03E-03 | -0,05                                         | 4,48E-01 | 0,08                                          | 2,25E-01 | 0,61                                    | 8,60E-05 |
| GRP78_MOUSE         | P20029    | 78 kDa glucose-regulated protein (GRP-78) (Heat shock 70 kDa protein 5) (Immunoglobulin heavy chain-binding protein) (BiP)                                                                                                                                                                                                                                                                          | Hspa5 Grp78         | 7,58E-03 | 0,00                                          | 1,00E+00 | 0,04                                          | 1,06E-01 | 0,22                                    | 3,36E-04 |

**Table S1.** Proteins identified by LC-MS/MS analyzed for global sex difference, global minocycline effect and the interaction effect between sex and minocycline treatment

|             |        |                                                                                                                                                                                                                                                                                      |                               |          |       |          |       |          |       |          |
|-------------|--------|--------------------------------------------------------------------------------------------------------------------------------------------------------------------------------------------------------------------------------------------------------------------------------------|-------------------------------|----------|-------|----------|-------|----------|-------|----------|
| HEXB_MOUSE  | P20060 | Beta-hexosaminidase subunit beta (EC 3.2.1.52) (Beta-N-acetylhexosaminidase subunit beta) (Hexosaminidase subunit B) (N-acetyl-beta-glucosaminidase subunit beta)                                                                                                                    | Hexb                          | 3,15E-03 | -0,09 | 2,69E-02 | 0,06  | 1,56E-01 | 0,32  | 3,56E-04 |
| VTDB_MOUSE  | P21614 | Vitamin D-binding protein (DBP) (VDB) (Gc-globulin) (Group-specific component)                                                                                                                                                                                                       | Gc                            | 1,91E-02 | 0,28  | 6,91E-02 | 0,42  | 8,59E-03 | 0,84  | 8,30E-03 |
| PENK_MOUSE  | P22005 | Proenkephalin-A [Cleaved into: Synenkephalin; Met-enkephalin (Opioid growth factor) (OGF); PENK(114-133); PENK(143-184); Met-enkephalin-Arg-Ser-Leu; Leu-enkephalin; PENK(238-259); Met-enkephalin-Arg-Phe]                                                                          | Penk Penk1                    | 1,85E-02 | 0,25  | 9,68E-05 | -0,04 | 4,13E-01 | 0,08  | 4,13E-01 |
| A1AT2_MOUSE | P22599 | Alpha-1-antitrypsin 1-2 (AAT) (Alpha-1 protease inhibitor 2) (Alpha-1-antiproteinase) (Serine protease inhibitor 1-2) (Serine protease inhibitor A1b) (Serpina A1b)                                                                                                                  | Serpina1b Aat2<br>Dom2 Spi1-2 | 4,34E-02 | 0,25  | 9,52E-02 | 0,49  | 2,31E-03 | 0,55  | 6,80E-02 |
| RS2_MOUSE   | P25444 | 40S ribosomal protein S2 (40S ribosomal protein S4) (Protein LLRep3)                                                                                                                                                                                                                 | Rps2 Llrep3 Rps4              | 1,93E-02 | -0,02 | 5,44E-01 | 0,00  | 9,92E-01 | 0,21  | 6,72E-04 |
| EZRI_MOUSE  | P26040 | Ezrin (Cytovillin) (Villin-2) (p81)                                                                                                                                                                                                                                                  | Ezr Vil2                      | 1,56E-03 | -0,06 | 3,60E-02 | 0,07  | 2,31E-02 | 0,25  | 2,37E-04 |
| PDIA3_MOUSE | P27773 | Protein disulfide-isomerase A3 (EC 5.3.4.1) (58 kDa glucose-regulated protein) (58 kDa microsomal protein) (p58) (Disulfide isomerase ER-60) (Endoplasmic reticulum resident protein 57) (ER protein 57) (ERp57) (Endoplasmic reticulum resident protein 60) (ER protein 60) (ERp60) | Pdia3 Erp Erp60<br>Grp58      | 1,73E-02 | -0,01 | 6,90E-01 | 0,04  | 1,24E-01 | 0,18  | 8,48E-04 |
| SEPT4_MOUSE | P28661 | Septin-4 (Brain protein H5) (Peanut-like protein 2)                                                                                                                                                                                                                                  | Sept4 Pnutl2                  | 2,17E-02 | -0,01 | 6,00E-01 | -0,04 | 9,80E-02 | -0,17 | 1,37E-03 |
| FETUA_MOUSE | P29699 | Alpha-2-HS-glycoprotein (Countertrypsin) (Fetuin-A)                                                                                                                                                                                                                                  | Ahsg Fetua                    | 1,56E-03 | 0,08  | 4,66E-01 | 0,48  | 4,09E-04 | 0,87  | 1,09E-03 |
| VTNC_MOUSE  | P29788 | Vitronectin (VN) (S-protein) (Serum-spreading factor)                                                                                                                                                                                                                                | Vtn                           | 1,56E-03 | 0,17  | 4,89E-05 | 0,15  | 1,68E-04 | 0,16  | 1,56E-02 |
| APOC1_MOUSE | P34928 | Apolipoprotein C-I (Apo-CI) (ApoC-I) (Apolipoprotein C1) [Cleaved into: Truncated apolipoprotein C-I]                                                                                                                                                                                | Apoc1                         | 6,27E-04 | 0,75  | 5,86E-06 | 0,36  | 8,40E-03 | 0,46  | 7,34E-02 |
| COIA1_MOUSE | P39061 | Collagen alpha-1(XVIII) chain [Cleaved into: Endostatin]                                                                                                                                                                                                                             | Col18a1                       | 8,03E-03 | 0,25  | 2,01E-04 | 0,14  | 2,10E-02 | 0,16  | 1,52E-01 |
| EF2_MOUSE   | P58252 | Elongation factor 2 (EF-2)                                                                                                                                                                                                                                                           | Eef2                          | 1,93E-02 | 0,00  | 9,25E-01 | 0,03  | 2,48E-01 | 0,19  | 8,24E-04 |
| RS8_MOUSE   | P62242 | 40S ribosomal protein S8                                                                                                                                                                                                                                                             | Rps8                          | 1,56E-03 | -0,03 | 2,77E-01 | 0,05  | 1,24E-01 | 0,29  | 8,19E-05 |
| RS12_MOUSE  | P63323 | 40S ribosomal protein S12                                                                                                                                                                                                                                                            | Rps12                         | 4,55E-02 | -0,04 | 3,36E-01 | 0,06  | 9,10E-02 | 0,24  | 3,46E-03 |
| APOA1_MOUSE | Q00623 | Apolipoprotein A-I (Apo-AI) (ApoA-I) (Apolipoprotein A1) [Cleaved into: Proapolipoprotein A-I (ProapoA-I); Truncated apolipoprotein A-I]                                                                                                                                             | Apoa1                         | 8,60E-04 | 0,54  | 2,26E-05 | 0,32  | 3,74E-03 | 0,39  | 6,11E-02 |
| A1AT4_MOUSE | Q00897 | Alpha-1-antitrypsin 1-4 (Alpha-1 protease inhibitor 4) (Serine protease inhibitor 1-4) (Serine protease inhibitor A1d) (Serpina A1d)                                                                                                                                                 | Serpina1d Dom4<br>Spi1-4      | 1,24E-02 | 0,25  | 3,87E-02 | 0,43  | 1,05E-03 | 0,52  | 3,15E-02 |
| A1AT5_MOUSE | Q00898 | Alpha-1-antitrypsin 1-5 (Alpha-1 protease inhibitor 5) (Serine protease inhibitor 1-5) (Serine protease inhibitor A1e) (Serpina A1e)                                                                                                                                                 | Serpina1e Dom5<br>Spi1-5      | 1,15E-07 | 1,87  | 1,53E-10 | 0,56  | 1,85E-03 | 0,92  | 8,12E-03 |
| CLUS_MOUSE  | Q06890 | Clusterin (Apolipoprotein J) (Apo-J) (Clustrin) (Sulfated glycoprotein 2) (SGP-2) [Cleaved into: Clusterin beta chain; Clusterin alpha chain]                                                                                                                                        | Clu Apoj Msgp-2               | 1,76E-04 | 0,12  | 2,94E-03 | 0,10  | 1,22E-02 | 0,39  | 3,43E-05 |

**Table S1.** Proteins identified by LC-MS/MS analyzed for global sex difference, global minocycline effect and the interaction effect between sex and minocycline treatment

|             |        |                                                                                                                                                                                |                                 |          |       |          |       |          |       |          |
|-------------|--------|--------------------------------------------------------------------------------------------------------------------------------------------------------------------------------|---------------------------------|----------|-------|----------|-------|----------|-------|----------|
| CALB2_MOUSE | Q08331 | Calretinin (CR)                                                                                                                                                                | Calb2                           | 2,16E-02 | 0,16  | 7,46E-04 | -0,03 | 4,84E-01 | -0,18 | 3,38E-02 |
| PADI2_MOUSE | Q08642 | Protein-arginine deiminase type-2 (EC 3.5.3.15) (Peptidylarginine deiminase II) (Protein-arginine deiminase type II)                                                           | Padi2 Pad2 Pdi Pdi2             | 4,20E-02 | 0,02  | 6,48E-01 | -0,01 | 7,48E-01 | -0,30 | 1,34E-03 |
| MYO1D_MOUSE | Q5SYD0 | Unconventional myosin-Id                                                                                                                                                       | Myo1d                           | 2,55E-02 | 0,03  | 1,18E-01 | -0,03 | 5,74E-02 | -0,10 | 3,46E-03 |
| CD166_MOUSE | Q61490 | CD166 antigen (Activated leukocyte cell adhesion molecule) (BEN) (Protein DM-GRASP) (CD antigen CD166)                                                                         | Alcam                           | 4,20E-02 | -0,09 | 1,35E-03 | -0,03 | 1,75E-01 | -0,09 | 7,62E-02 |
| GDIB_MOUSE  | Q61598 | Rab GDP dissociation inhibitor beta (Rab GDI beta) (GDI-3) (Guanosine diphosphate dissociation inhibitor 2) (GDI-2)                                                            | Gdi2 Gdi3                       | 4,89E-02 | 0,10  | 3,69E-04 | -0,03 | 2,24E-01 | -0,02 | 5,99E-01 |
| HPT_MOUSE   | Q61646 | Haptoglobin (Zonulin) [Cleaved into: Haptoglobin alpha chain; Haptoglobin beta chain]                                                                                          | Hp                              | 2,74E-05 | 0,84  | 9,02E-06 | 0,47  | 3,61E-03 | 1,34  | 1,48E-04 |
| PZP_MOUSE   | Q61838 | Pregnancy zone protein (Alpha-2-macroglobulin) (Alpha-2-M) [Cleaved into: Alpha-2-macroglobulin 165 kDa subunit; Alpha-2-macroglobulin 35 kDa subunit]                         | Pzp A2m                         | 1,56E-03 | 0,33  | 6,61E-05 | 0,23  | 2,29E-03 | 0,19  | 1,55E-01 |
| CSPG2_MOUSE | Q62059 | Versican core protein (Chondroitin sulfate proteoglycan core protein 2) (Chondroitin sulfate proteoglycan 2) (Large fibroblast proteoglycan) (PG-M)                            | Vcan Cspg2                      | 8,60E-04 | -0,02 | 1,01E-01 | -0,05 | 3,52E-04 | -0,10 | 5,19E-04 |
| DDX3X_MOUSE | Q62167 | ATP-dependent RNA helicase DDX3X (EC 3.6.4.13) (D1Pas1-related sequence 2) (DEAD box RNA helicase DEAD3) (mDEAD3) (DEAD box protein 3, X-chromosomal) (Embryonic RNA helicase) | Ddx3x D1Pas1-rs2 Ddx3 Dead3 Erh | 6,27E-04 | -0,29 | 8,08E-07 | 0,02  | 7,15E-01 | 0,06  | 4,97E-01 |
| IF4G1_MOUSE | Q6NZJ6 | Eukaryotic translation initiation factor 4 gamma 1 (eIF-4-gamma 1) (eIF-4G 1) (eIF-4G1)                                                                                        | Eif4g1                          | 3,61E-03 | 0,00  | 8,57E-01 | 0,02  | 2,00E-01 | 0,15  | 1,45E-04 |
| VAT1L_MOUSE | Q80TB8 | Synaptic vesicle membrane protein VAT-1 homolog-like (EC 1.-.-.-)                                                                                                              | Vat1l Kiaa1576                  | 3,58E-02 | 0,16  | 3,07E-03 | 0,04  | 4,12E-01 | 0,24  | 1,87E-02 |
| FIBB_MOUSE  | Q8K0E8 | Fibrinogen beta chain [Cleaved into: Fibrinopeptide B; Fibrinogen beta chain]                                                                                                  | Fgb                             | 1,56E-03 | 0,28  | 1,25E-03 | 0,21  | 9,70E-03 | 0,52  | 2,16E-03 |
| SPA3N_MOUSE | Q91WP6 | Serine protease inhibitor A3N (Serpina A3N)                                                                                                                                    | Serpina3n Spi2                  | 1,25E-02 | -0,09 | 4,85E-01 | 0,22  | 9,27E-02 | 0,99  | 7,31E-04 |
| HEMO_MOUSE  | Q91X72 | Hemopexin                                                                                                                                                                      | Hpx Hpxn                        | 4,02E-06 | 0,45  | 5,23E-06 | 0,39  | 2,68E-05 | 0,69  | 1,25E-04 |
| TRFE_MOUSE  | Q92111 | Serotransferrin (Transferrin) (Beta-1 metal-binding globulin) (Siderophilin)                                                                                                   | Tf Trf                          | 2,09E-03 | 0,12  | 1,73E-01 | 0,33  | 1,15E-03 | 0,66  | 1,17E-03 |
| PSIP1_MOUSE | Q99JF8 | PC4 and SFRS1-interacting protein (Lens epithelium-derived growth factor) (mLEDGF)                                                                                             | Psip1 Ledgf                     | 1,91E-02 | -0,10 | 1,62E-04 | -0,03 | 2,33E-01 | -0,05 | 2,70E-01 |
| PBDC1_MOUSE | Q9D0B6 | Protein PBDC1 (Polysaccharide biosynthesis domain-containing protein 1)                                                                                                        | Pbdc1                           | 1,14E-02 | -0,16 | 5,12E-05 | -0,03 | 3,65E-01 | 0,05  | 4,48E-01 |
| GATM_MOUSE  | Q9D964 | Glycine amidinotransferase, mitochondrial (EC 2.1.4.1) (L-arginine:glycine amidinotransferase) (Transamidinase)                                                                | Gatm                            | 1,73E-02 | -0,12 | 3,35E-02 | -0,07 | 2,16E-01 | 0,41  | 1,23E-03 |
| SNP29_MOUSE | Q9ERB0 | Synaptosomal-associated protein 29 (SNAP-29) (Golgi SNARE of 32 kDa) (Gs32) (Soluble 29 kDa NSF attachment protein) (Vesicle-membrane fusion protein SNAP-29)                  | Snap29                          | 1,73E-02 | 0,29  | 1,02E-03 | 0,18  | 2,24E-02 | 0,41  | 1,07E-02 |
